# Supplementary material
Source: PubMed Central journal article supplement (PMC2881810)

## SUPPLEMENTARY FIGURE LEGENDS

Sup. Fig. S1. Kinetics of PARP-1 WT and Zn3 mutants automodification performed using a colorimetric assay. Time points in the linear portion of the reaction profile were measured for several  $\text{NAD}^+$  concentrations to provide initial rates in pmol of ADP-ribose/s. Initial rates were plotted versus total  $\text{NAD}^+$  concentration and fitted using the Michaelis-Menton model to the data and yielded  $K_M$  ( $\mu\text{M}$ ) and  $V_{\text{MAX}}$  (pmol/s). *A.* Example of a Michaelis-Menton plot of a DNA-dependent experiment for WT, W318R, and T316A mutant. The reactions were performed in the presence of 20 nM protein and 40 nM DNA. *B.* Example of a Michaelis-Menton plot of a DNA-independent experiment for WT, W318R and T316A mutant. The reactions were performed in the presence of 60 nM protein.

Sup. Fig. S2. Binding affinity of PARP-1 WT and Zn3 mutants. The binding affinity was determined by fluorescence polarization using an 18-basepair (bp) duplex containing a fluorescein derivative (6-FAM). The reactions were performed with 5 nM of probe and various concentrations of protein. The observed binding constant was obtained from a non-linear least squares fit to the data using a two state binding model.

Sup. Fig. S3. Analytical gel filtration elution profiles for full-length WT PARP-1 and W318R PARP-1. 50  $\mu\text{L}$  of WT PARP-1 (43  $\mu\text{M}$ ) or W318R (100  $\mu\text{M}$ ) were injected onto a 24 mL analytical S200 Superdex column (GE Healthcare). Proteins were eluted with isocratic flow of 40 mL of buffer (20 mM Hepes pH 8.0, 150 mM NaCl, 0.1 mM TCEP, 1 mM EDTA). 0.5 ml fractions were collected and absorbance at 280 nm was recorded. This column has an 8 mL void volume. The two PARP-1 proteins elute at the same volume with the same peak shape. The difference in peak height is proportional to the difference in protein concentration loaded.

Sup. Fig. S4. CD spectra for full-length WT PARP-1 and W318R PARP-1. CD wavelength scans (280–200 nm) were performed at 4 °C in a quartz cuvette of 1 mm path length on a JASCO J-810 spectropolarimeter. The protein was at 2.5  $\mu\text{M}$  in a buffer composed of 5 mM  $\text{Na}_2\text{KPO}_4$ , pH 7.5, 50 mM  $\text{Na}_2\text{SO}_4$ , and 0.1 mM TCEP. Each spectrum represents the average of three scans. The two PARP-1 proteins have similar spectra, indicating that there are no major structural differences between the two proteins.

Sup. Fig. S5. Mutations at the Zn3 dimer interface do not disrupt PARP-1 DNA-dependent activity. *A.* Zn3 crystallographic dimer with mutated residues shown in blue and numbered. A key for the numbering

is shown in panel C. *B.* The monomeric NMR structure with mutated residues as shown in A. Amino acid P359 (#10) was not present in the Zn3 domain construct used in the NMR study, and is therefore not shown in panel B. *C.* DNA-dependent activity of WT PARP-1 and Zn3 dimer mutants (0.62 mM) with 1  $\mu$ M duplex DNA and 5 mM NAD<sup>+</sup>.

# Supplementary Figure S1

A

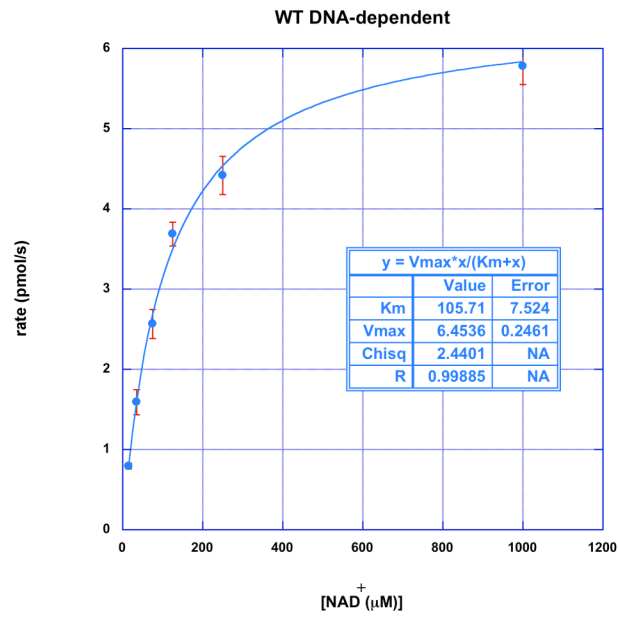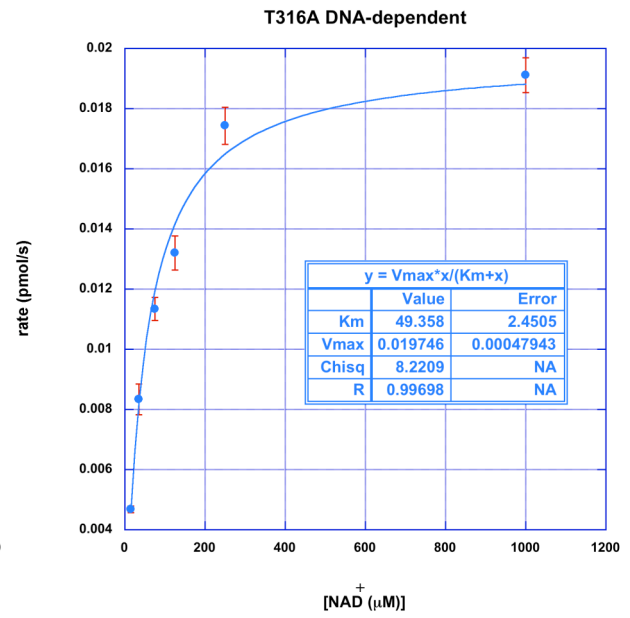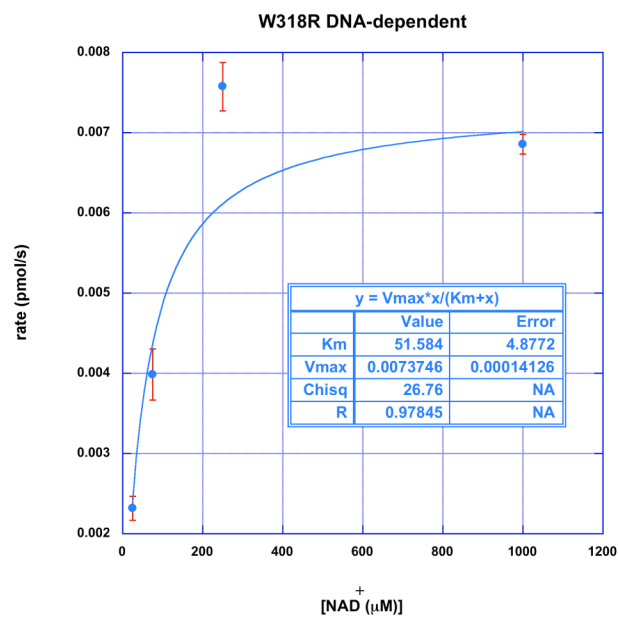

# Supplementary Figure S1

B

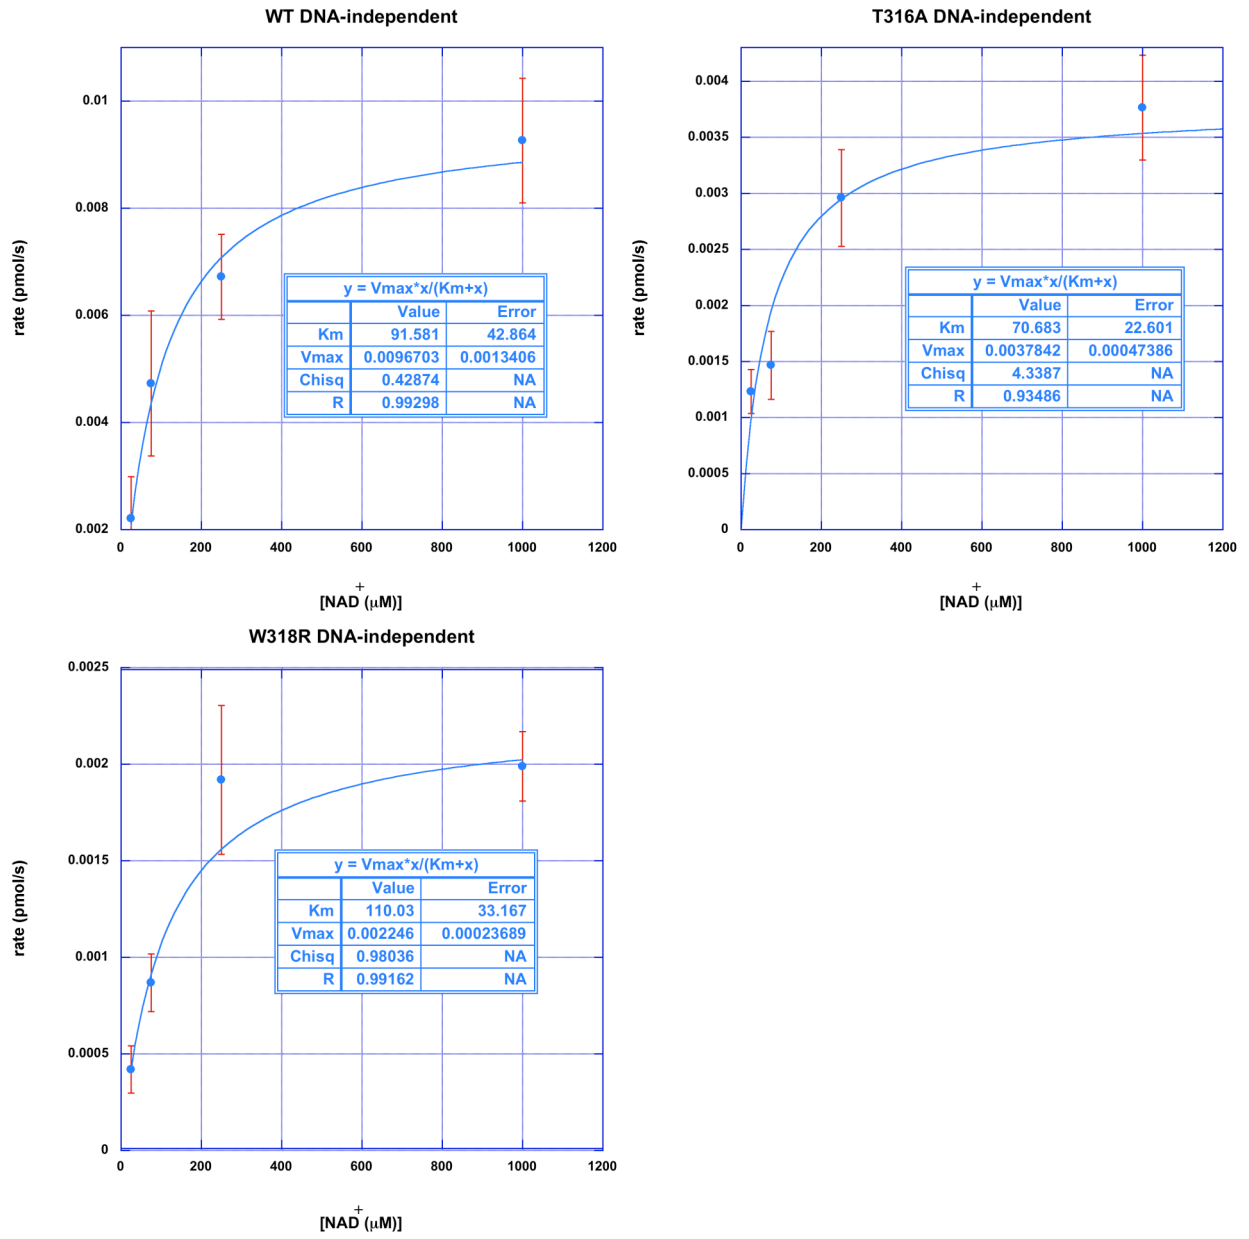

## Supplementary Figure S2

### Zn ribbon mutants

|              | <b>K<sub>D</sub></b> | <b>error ±</b> |
|--------------|----------------------|----------------|
| <b>WT</b>    | <b>14.42</b>         | <b>2.2</b>     |
| <b>D314A</b> | <b>20.86</b>         | <b>2.76</b>    |
| <b>V315A</b> | <b>12.21</b>         | <b>2.25</b>    |
| <b>T316A</b> | <b>23.14</b>         | <b>4.36</b>    |
| <b>T316S</b> | <b>13.53</b>         | <b>1.68</b>    |
| <b>A317G</b> | <b>14.74</b>         | <b>3.88</b>    |
| <b>A317S</b> | <b>20.15</b>         | <b>4.89</b>    |
| <b>W318R</b> | <b>19.53</b>         | <b>1.63</b>    |
| <b>W318F</b> | <b>16.77</b>         | <b>1.69</b>    |
| <b>W318A</b> | <b>25.02</b>         | <b>2.89</b>    |
| <b>T319A</b> | <b>14.07</b>         | <b>1.55</b>    |
| <b>K320A</b> | <b>5.04</b>          | <b>1.07</b>    |

### Dimer interface mutants

|                    | <b>K<sub>D</sub></b>  | <b>error ±</b> |
|--------------------|-----------------------|----------------|
| <b>WT</b>          | <b>12.61</b>          | <b>2.16</b>    |
| <b>Q241L</b>       | <b>15.25</b>          | <b>1.89</b>    |
| <b>R340E</b>       | <b>12.61</b>          | <b>1.68</b>    |
| <b>E341R</b>       | <b>9.57</b>           | <b>1.18</b>    |
| <b>Y344D</b>       | <b>12.03</b>          | <b>2.46</b>    |
| <b>L345D</b>       | <b>15.79</b>          | <b>1.39</b>    |
| <b>R355D</b>       | <b>29.46</b>          | <b>2.76</b>    |
| <b>F357D</b>       | <b>22.77</b>          | <b>2.04</b>    |
| <b>F357Y</b>       | <b>10.77</b>          | <b>2.5</b>     |
| <b>L348D/V350D</b> | <b>12.18</b>          | <b>1.69</b>    |
| <b>P358G/P359G</b> | <b>not determined</b> |                |

Supplementary Figure S3

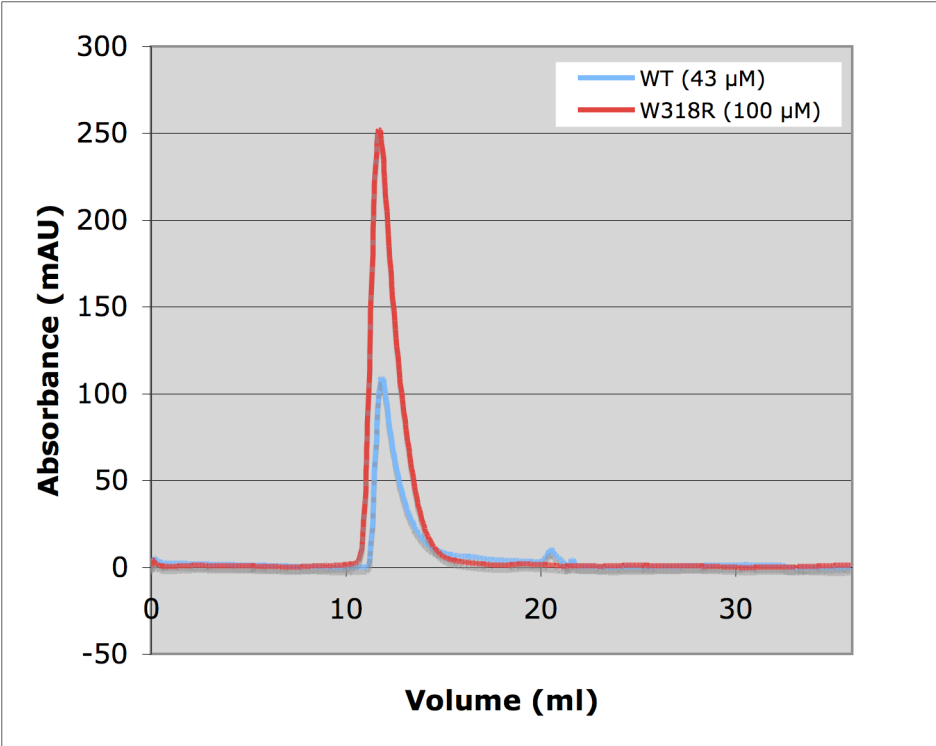

Supplementary Figure S4

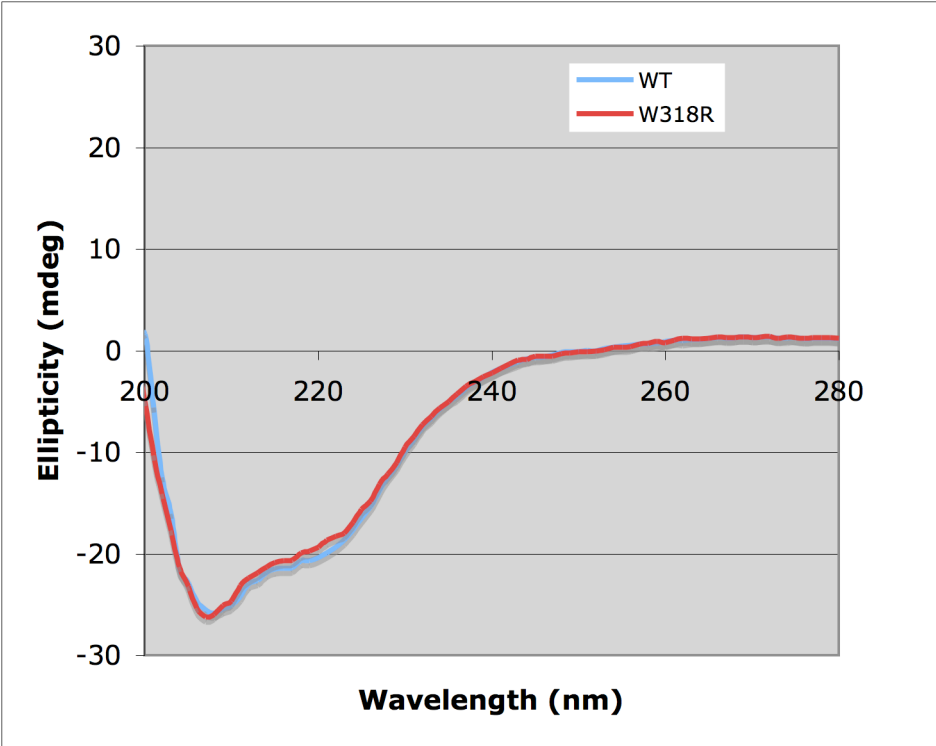

# Supplementary Figure S5

**A**

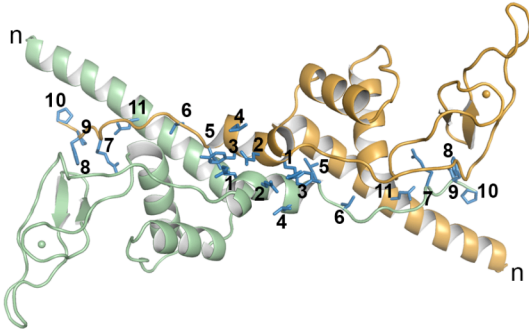

**B**

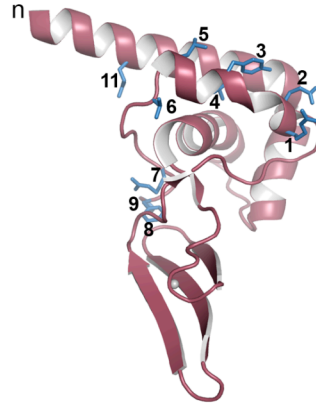

**C**

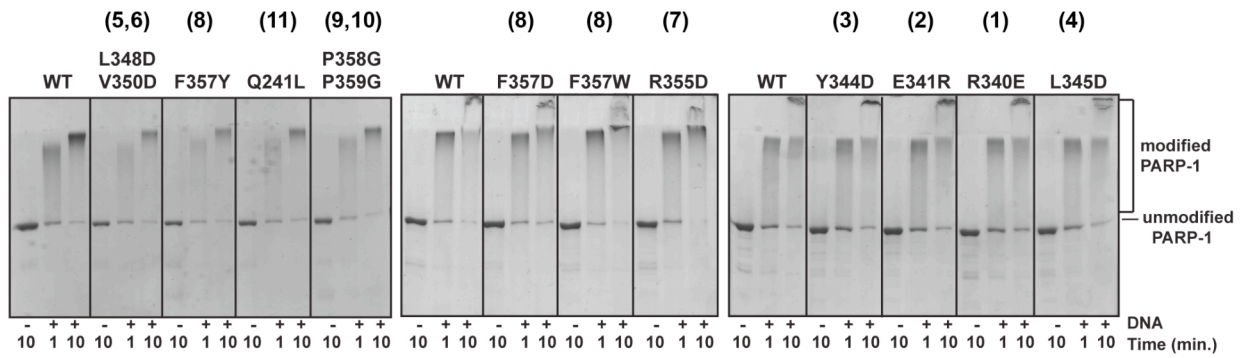

Supplement: supp_M110.105668_jbc.M110.105668-1.pdf [file supp_M110.105668_jbc.M110.105668-1.pdf]
